# Supplementary material
Source: PubMed Central journal article supplement (PMC3372221)
Supplement: supp_86.11.6197_TableS1.pdf [file supp_86.11.6197_TableS1.pdf]

**TABLE S1 Primers used in this study<sup>a</sup>**

| Upstream Primers (sense strand) |                                                                    | Downstream Primers (antisense strand) |                                                                        |
|---------------------------------|--------------------------------------------------------------------|---------------------------------------|------------------------------------------------------------------------|
| Name                            | Sequence                                                           | Name                                  | Sequence                                                               |
| U(1)                            | <b>GAGGATCC</b> GAGTTATTCC                                         | D(1)                                  | <b>GAGGATCC</b> TTGTGCTTAATG                                           |
| U(2,3)                          | <b>GAGGATCC</b> ACCGGTGGTTTGTG                                     | D(2,3)                                | <b>GAGGATCC</b> GTCCCAGATTACGAGCC                                      |
| U(4-10)                         | <b>GAGGATCC</b> GATAGAAGCGATGGATAC                                 | D(4-10)                               | <b>GAGGATCC</b> ATTTAAGTTCACC                                          |
| 1 <sub>c</sub>                  | GGTAATCGCGGCGGCAGTTGAAACTTCACC                                     | 1 <sub>B</sub>                        | TTCAACTGCCGCCGCGATTACCTTACTCATG                                        |
| 2 <sub>c</sub>                  | TTAAGCACGCGGCAGCCATTCCAAATTCTTTG                                   | 2 <sub>B</sub>                        | TTGGAATGGCTGCCGCGTGCTTAATGTTTCCA                                       |
| 3 <sub>c</sub>                  | AAACATTTGCGGCTGCATCCATCTTCATCAAC                                   | 3 <sub>B</sub>                        | AGATGGATGCAGCCGCAAATGTTTCTCTGTA                                        |
| 4 <sub>c</sub>                  | CACTCAGTGCAGCAGCAGCACAATTGGCCAAGGCA                                | 4 <sub>B</sub>                        | CCAATTGTGCTGCTGCTGCACTGAGTGATTCTAGTTC                                  |
| 5 <sub>c</sub>                  | GCACTCGCGGCACTAATCATTGATAG                                         | 5 <sub>B</sub>                        | GATTAGTGCCGCGAGTGCGAATGTAAT                                            |
| 6 <sub>c</sub>                  | AATCATTGCTGCAGCAGTGGTGGCTAACGTT                                    | 6 <sub>B</sub>                        | CCACCACTGCTGCAGCAATGATTAGTTTCTTG                                       |
| 7 <sub>c</sub>                  | AGATAGTGCAGCTGTATCAATGACTGA                                        | 7 <sub>B</sub>                        | TGATACAGCTGCACTATCTCCAGAGA                                             |
| 8 <sub>c</sub>                  | AATGTAGCAGCAGCTCTGGCTCGTAATCTG                                     | 8 <sub>B</sub>                        | GAGCCAGAGCTGCTGCTACATTTTCAGTCA                                         |
| 9 <sub>c</sub>                  | GATATTGCTGCTGCATATGATGAGATAG                                       | 9 <sub>B</sub>                        | CATCATATGCAGCAGCAATATCAA CAAGTC                                        |
| 10 <sub>c</sub>                 | AGATAGCGCTGCAGCAGCGCCAATATTCAATG                                   | 10 <sub>B</sub>                       | TATTGGCGCTGCTGCAGCGCTATCTTCATCAT                                       |
| Cloning U                       | <b>GAGGATCCC</b> <u><b>ATATG</b></u> AGTAAGGTAATC                  | Cloning D                             | <b>GAGGATCC</b> <u><b>TTATAC</b></u> ATTGAATATTGGC                     |
| Cloning Mutant U(1)             | <b>GAGGATCCC</b> <u><b>ATATG</b></u> AGTAAGGTAATCGCGGCGGCAGTTGAAAC | Cloning Mutant D(10)                  | <b>GAGGATCC</b> <u><b>TTATAC</b></u> ATTGAATATTGGCGCTGCTGCAGCGCTATCTTC |
| mCherry 5'                      | <b>GCAGATCTCATATGGGATCC</b> GTGAGCAAGGGCGAGG                       | mCherry 3'                            | <b>GTAGATCTTCACTTGTACAGCTCGTCC</b>                                     |
|                                 |                                                                    | I3 no stop 3'                         | <b>GAGGATCC</b> TACATTGAATATTGGC                                       |
| I3-siRNA sense                  | GAUAGAAGCGAUGGAUACUtt                                              | I3-siRNA antisense                    | AGUAUCCAUCGCUUCUAUCtt                                                  |
| MM-siRNA sense                  | GAUAGAACGGAUCCAUACUtt                                              | MM-siRNA antisense                    | AGUAUGGAUCCGUUCUAUCtt                                                  |

<sup>a</sup> All primers are written 5'→3'; restriction enzyme sites are bolded; the altered nucleotides are underlined; the initiating and terminating codons are double underlined. Those residues altered in the siRNA-I3 MM duplex are marked with strike-throughs.

<sup>b</sup> For the U and D primers, the numbers in the parentheses designate the alleles for which each primer was used.

U(x) + X<sub>B</sub>

D(x) + X<sub>C</sub>
